# Supplementary material for: Case Report: A de novo Variant in NALCN Associated With CLIFAHDD Syndrome in a Chinese Infant
Source: Front Pediatr. 2022 Jul 13;10:927392. doi: 10.3389/fped.2022.927392 (PMC9326163; doi:10.3389/fped.2022.927392)
Supplement: Supplementary Table S1 — The previous reported NALCN variants and phenotypes in CLIFAHDD. [file Table_1.XLSX]

## Sheet: Sheet1
Reference	PMID: 25683120	PMID: 25683120	PMID: 25683120	PMID: 25683120	PMID: 25683120	PMID: 25683120	PMID: 25683120	PMID: 25683120	PMID: 25683120	PMID: 25683120	PMID: 25683120	PMID: 25683120	PMID: 25683120	PMID: 25683120	PMID: 25864427	PMID:26763878	PMID:26763878	PMID:26763878	PMID: 28133733	PMID: 28133733	PMID: 28133733	PMID: 28133733	PMID:30167850	PMID: 27558372	PMID:27214504	PMID:27214504	PMID: 27473021	Frequency	Present case
Mutation
cDNA change	c.530A>C	c.938T>G	c.1768C>T	c.4338T>G	c.3493A>C	c.934C>A	c.1526T>C	c.3017T>C	c.979G>A	c.1538C>A	c.1733A>C	c.3542G>A	c.1534T>G	c.3050T>C	c.3542G>A	c.934C>G	c.3542G>A	c.3058G>T	c.3448C>G	c.1733A>G	c.1733A>G	c.1745A>C	c.4333A>T	c.1768C>T	c.950T>G	c.1783G>T	c.965T>C		c.4300A>G
Predicted protein alteration	p.Gln177Pro	p.Val313Gly	p.Leu590Phe	p.Ile1446Met	p.Thr1165Pro	p.Leu312Ile	p.Leu509Ser	p.Val1006Ala	p.Glu327Lys	p.Thr513Asn	p.Tyr578Ser	p.Arg1181Gln	p.Phe512Val	p.Ile1017Thr	p.Arg1181Gln	p.Leu312Val	p.Arg1181Gln	p.Val1020Phe	p.Leu1150Val	p.Tyr578Cys	p.Tyr578Cys	p.Tyr582Ser	p.Ile1445Leu	p.Leu590Phe	p.Phe317Cys	p.Val595Phe	p.Met1332Thr		p.Ile1434Val
Domain	1	1	2	4	3	1	2	3	1	2	2	3	2	3	3	1	3	3	3	2	2	2	4	2	1	2	4		4
Transmembrane Segment and UniProt prediction	IS5	IS6	IIS6	IVS6	IIIS6	IS6	IIS5	IIIS5	IS6	IIS5	IIS6	IIIS6	IIS5	IIIS5	IIIS6	IS6	IIIS6	IIIS5	IIIS6	IIS6	IIS6	IIS6	IVS6	IIS6	IS6	IS6	IVS5		IVS6
Age at onset	ND	ND	ND	ND	ND	ND	ND	ND	ND	ND	ND	ND	ND	ND	ND	At birth	At birth	2 months	ND	ND	ND	ND	ND	At birth	At birth	At birth	At birth		At birth
Gender	F	M	M	F	M	F	M	M	F	M	M	F	F	M	F	F	F	F	F	M	F	M	M	F	F	F	M		M
Age at walking	ND	ND	ND	ND	ND	ND	ND	ND	ND	ND	ND	ND	ND	ND	ND	ND	ND	ND	34m	ND	ND	ND	4 years	ND	Na	ND	ND		Na
Age at talking	ND	ND	ND	ND	ND	ND	ND	ND	ND	ND	ND	ND	ND	ND	ND	ND	ND	ND	ND	ND	ND	ND	4 years	ND	Na	ND	ND		ND
Age at time of death	6 months	5 years	4 months	ND	ND	ND	ND	ND	ND	ND	ND	ND	ND	ND	ND	ND	ND	ND	ND	ND	ND	ND	ND	ND	9 month	3 month	ND		Na
At Birth: Weight (W),Height (H), Occipitofrontal circumference (OFC)	ND	ND	ND	ND	ND	ND	ND	ND	ND	ND	ND	ND	ND	ND	ND	W: 2726 g, H:46 cm, OFC: 34 cm	W: 2900 g , H:47.5 cm, OFC: 31 cm	W: 2840 g, H: NA, OFC:34 cm	W:3459g, H:45.72cm, OFC: unknown	W:3260g, H: 43.2cm, OFC: unknown	W:2490g, H: 41.5cm, OFC: unknown	W:2784g, H: 43cm, OFC: 34.5cm	ND	ND	W:2,030g, H:ND, OFC: ND	W:2,985g, H: ND, OFC: ND	ND		W:3100g H: 47cm, OFC:33cm
Facial features
Downslanting palpebral fissures	no	yes	ND	yes	yes	yes	yes	yes	?	yes	yes	yes	no	yes	yes	ND	ND	ND	ND	ND	ND	ND	no	yes	ND	ND	ND	13/27	yes
Strabismus	no	yes	ND	yes	yes	yes	yes	yes	no	yes	no	no	no	no	ND	ND	ND	ND	no	yes	yes	no	yes	ND	ND	ND	ND	10/27	yes
Esotropia	no	yes	ND	yes	yes	no	no	no	no	no	yes	no	no	no	yes	no	no	no	no	no	no	yes	no	ND	ND	ND	ND	6/27	no
myopia	ND	ND	ND	ND	ND	ND	ND	ND	ND	ND	ND	ND	ND	ND	ND	ND	ND	ND	no	yes	no	no	no	ND	ND	ND	ND	1/27	no
eyelid and facial myotonia	ND	ND	ND	ND	ND	ND	ND	ND	ND	ND	ND	ND	ND	ND	ND	ND	ND	ND	ND	ND	ND	ND	ND	yes	ND	ND	ND	1/27	no
Broad nasal bridge	yes	yes	yes	yes	yes	yes	yes	yes	yes	yes	yes	yes	yes	yes	yes	yes	yes	yes	ND	ND	ND	ND	no	ND	ND	ND	ND	18/27	yes
Anteverted nasal tip	yes	yes	yes	yes	yes	no	yes	yes	yes	yes	no	yes	yes	yes	yes	ND	ND	ND	ND	ND	ND	ND	no	ND	ND	ND	ND	13/27	yes
Large nares	yes	yes	yes	yes	yes	yes	yes	yes	yes	yes	yes	yes	yes	yes	yes	ND	ND	ND	ND	ND	ND	ND	no	ND	ND	ND	ND	15/27	yes
Short columella	yes	yes	yes	yes	yes	yes	yes	yes	yes	yes	yes	yes	yes	yes	yes	ND	ND	ND	ND	ND	ND	ND	no	ND	ND	ND	ND	15/27	yes
Long philtrum	yes	yes	yes	yes	yes	yes	yes	yes	yes	yes	yes	no	no	yes	yes	ND	ND	ND	ND	ND	ND	ND	no	ND	ND	ND	yes	14/27	yes
Micrognathia	yes	yes	yes	yes	yes	yes	yes	yes	yes	yes	yes	yes	yes	no	no	no	yes	yes	ND	ND	ND	ND	no	yes	ND	ND	ND	16/27	yes
Pursed lips	yes	yes	yes	yes	yes	no	yes	no	no	yes	yes	yes	no	?	no	ND	ND	ND	ND	ND	ND	ND	no	yes	ND	ND	ND	11/27	yes
Hnoshaped dimpled chin	yes	yes	yes	yes	no	yes	yes	no	no	yes	no	yes	no	no	no	ND	ND	ND	ND	ND	ND	ND	no	ND	yes	yes	ND	10/27	yes
Deep nasolabial folds	yes	yes	yes	yes	yes	no	yes	yes	yes	no	yes	yes	yes	yes	no	ND	ND	ND	ND	ND	ND	ND	no	ND	ND	ND	ND	12/27	yes
Full cheeks	yes	yes	yes	yes	yes	yes	no	yes	yes	yes	yes	yes	yes	yes	yes	ND	ND	ND	ND	ND	ND	ND	no	ND	yes	yes	ND	16/27	yes
Prominent (broad) forehead	ND	ND	ND	ND	ND	ND	ND	ND	ND	ND	ND	ND	ND	ND	ND	no	yes	yes	ND	ND	ND	ND	ND	ND	ND	ND	ND	2/27	no
Brachycephaly	ND	ND	ND	ND	ND	ND	ND	ND	ND	ND	ND	ND	ND	ND	ND	no	yes	yes	ND	ND	ND	ND	ND	ND	ND	ND	ND	2/27	no
Hypertelorism	ND	ND	ND	ND	ND	ND	ND	ND	ND	ND	ND	ND	ND	ND	ND	no	no	yes	ND	ND	ND	ND	ND	ND	ND	ND	ND	1/27	no
Epicanthal folds	ND	ND	ND	ND	ND	ND	ND	ND	ND	ND	ND	ND	ND	ND	ND	yes	no	yes	ND	ND	ND	ND	ND	ND	ND	ND	ND	2/27	no
Large ears	ND	ND	ND	ND	ND	ND	ND	ND	ND	ND	ND	ND	ND	ND	ND	no	no	yes	ND	ND	ND	ND	ND	ND	ND	ND	ND	1/27	no
Low-set ears	ND	ND	ND	ND	ND	ND	ND	ND	ND	ND	ND	ND	ND	ND	ND	no	yes	yes	ND	ND	ND	ND	ND	ND	no	yes	yes	4/27	no
Pominent slender nose	ND	ND	ND	ND	ND	ND	ND	ND	ND	ND	ND	ND	ND	ND	ND	no	no	yes	ND	ND	ND	ND	ND	ND	ND	ND	ND	1/27	no
Small nose	ND	ND	ND	ND	ND	ND	ND	ND	ND	ND	ND	ND	ND	ND	ND	no	no	yes	ND	ND	ND	ND	ND	ND	ND	ND	ND	1/27	no
small mouth	ND	ND	ND	ND	ND	ND	ND	ND	ND	ND	ND	ND	ND	ND	ND	ND	ND	ND	ND	ND	ND	ND	ND	ND	yes	yes	yes	3/27	no
Anteverted nasal tip	ND	ND	ND	ND	ND	ND	ND	ND	ND	ND	ND	ND	ND	ND	ND	yes	no	yes	ND	ND	ND	ND	ND	ND	ND	ND	ND	2/27	no
Smooth Philtrum	ND	ND	ND	ND	ND	ND	ND	ND	ND	ND	ND	ND	ND	ND	ND	yes	yes	yes	ND	ND	ND	ND	ND	ND	ND	ND	ND	3/27	no
Thin upper lip	ND	ND	ND	ND	ND	ND	ND	ND	ND	ND	ND	ND	ND	ND	ND	no	yes	yes	ND	ND	ND	ND	ND	ND	ND	ND	ND	2/27	no
High arched palate	ND	ND	ND	ND	ND	ND	ND	ND	ND	ND	ND	ND	ND	ND	ND	yes	yes	ND	ND	ND	ND	ND	ND	ND	ND	ND	ND	2/27	no
Hypoplastic mandible	ND	ND	ND	ND	ND	ND	ND	ND	ND	ND	ND	ND	ND	ND	ND	no	yes	no	ND	ND	ND	ND	ND	ND	ND	ND	ND	1/27	no
Macrocephaly	ND	ND	ND	ND	ND	ND	ND	ND	ND	ND	ND	ND	ND	ND	ND	ND	ND	ND	ND	ND	ND	ND	ND	ND	yes	no	ND	1/27	no
Microcephaly	ND	ND	ND	ND	ND	ND	ND	ND	ND	ND	ND	ND	ND	ND	ND	yes	yes	yes	ND	ND	ND	ND	ND	ND	no	no	ND	3/27	no
frontal bossing	ND	ND	ND	ND	ND	ND	ND	ND	ND	ND	ND	ND	ND	ND	ND	ND	ND	ND	ND	ND	ND	ND	ND	yes	ND	ND	ND	1/27	no
short palpebral fissures	ND	ND	ND	ND	ND	ND	ND	ND	ND	ND	ND	ND	ND	ND	ND	ND	ND	ND	ND	ND	ND	ND	ND	yes	ND	ND	ND	1/27	no
square face	ND	ND	ND	ND	ND	ND	ND	ND	ND	ND	ND	ND	ND	ND	ND	ND	ND	ND	ND	ND	ND	ND	ND	yes	ND	ND	ND	1/27	no
Short neck	yes	yes	yes	yes	yes	ND	yes	no	yes	no	yes	yes	yes	ND	ND	no	yes	no	ND	ND	ND	ND	ND	ND	no	yes	ND	12/27	yes
Features of limbs
Arthrogryposis multiplex congenita	yes	yes	yes	yes	yes	yes	yes	yes	yes	yes	yes	yes	yes	yes	yes	yes	yes	no	no	yes	yes	yes	no	yes	yes	yes	yes	24/27	no
Camptodactyly	yes	yes	yes	yes	yes	yes	yes	yes	yes	yes	yes	yes	yes	yes	yes	yes	yes	yes	ND	ND	ND	ND	no	yes	yes	yes	yes	22/27	yes
Ulnar deviation	yes	yes	yes	yes	yes	yes	yes	yes	yes	yes	yes	yes	yes	yes	yes	yes	yes	yes	ND	ND	ND	ND	ND	yes	yes	no	yes	21/27	yes
Adducted thumbs	yes	yes	yes	yes	yes	yes	yes	yes	yes	yes	yes	yes	yes	yes	yes	yes	no	no	ND	ND	ND	ND	ND	yes	no	yes	ND	18/27	yes
Clubfoot	yes	yes	yes	L	metatarsus adductus	yes	yes	mild L varus	yes	yes	yes	no	mild varus	yes	yes	yes	no	no	no	yes	yes	yes	ND	ND	yes	ND	ND	19/27	no
Calcaneovalgus deformity	no	yes	no	R	no	no	no	no	no	no	no	no	yes	no	ND	yes	no	ND	ND	ND	ND	ND	ND	ND	ND	ND	ND	4/27	no
Joint contractures (hip/elbow/knee)	yes	yes	yes	yes	no	yes	yes	yes	yes	yes	yes	yes	yes	yes	yes	yes	no	no	no	yes	yes	yes	no	yes	ND	ND	ND	19/27	yes
Long thin fingers	ND	ND	ND	ND	ND	ND	ND	ND	ND	ND	ND	ND	ND	ND	ND	ND	ND	ND	ND	ND	ND	ND	yes	ND	ND	ND	ND	1/27	no
Short stature	ND	ND	ND	ND	ND	ND	ND	ND	ND	ND	ND	ND	ND	ND	ND	ND	ND	ND	yes	yes	yes	yes	ND	ND	ND	ND	ND	4/27	no
Other clinical features
Scoliosis	yes	yes	no	yes	no	ND	yes	no	no	no	yes	no	lumbar lordosis	no	ND	ND	ND	ND	ND	ND	ND	ND	ND	ND	yes	no	ND	7/27	no
Intellectual disability	yes	yes	yes	yes	yes	yes	yes	yes	yes	yes	yes	yes	yes	yes	yes	yes	yes	yes	yes	yes	no	no	yes	ND	ND	ND	ND	21/27	yes
Development delay	yes	yes	yes	yes	yes	yes	yes	yes	yes	yes	yes	yes	yes	yes	yes	yes	yes	yes	no	no	yes	yes	yes	ND	ND	ND	yes	22/27	yes
Cognitive delay	ND	yes	ND	yes	yes	yes	no	yes	yes	yes	yes	yes	yes	yes	yes	yes	yes	yes	ND	ND	ND	ND	ND	ND	ND	ND	ND	15/27	yes
Delayed speech and language development	Na	yes	Na	yes	yes	yes	yes	yes	yes	yes	yes	yes	yes	yes	yes	yes	yes	yes	ND	ND	ND	ND	yes	ND	ND	ND	ND	19/27	yes
Motor delay	yes	yes	yes	yes	yes	yes	yes	yes	yes	yes	yes	yes	yes	yes	yes	yes	yes	yes	ND	ND	ND	ND	yes	ND	ND	ND	yes	20/27	yes
Seizures	yes	yes	no	no	no	no	no	no	no	no	no	no	no	no	ND	no	no	no	no	yes	no	yes	no	ND	ND	ND	ND	4/27	no
MRI findings	normal	mild cerebral and cerebellar atrophy	ND	generalized cerebral atrophy, small pituitary	normal	cerebellar atrophy	normal	ND	ND	diffuse cerebellar atrophy	ND	normal	normal	white matter edema	ND	Cerebellar atrophy	Loss of white matter volume	Loss of white matter volume	Cerebellar atrophy	Cerebellar atrophy	Small subependymal cysts along the lateral ventricles	Thin appearance of the corpus callosum	cerebellar atrophy	punctate and linear nonhemorrhagic foci in the periventricular white matter	Intracranial bleeding in periventricular areas, a thin corpus callosum, and small vermis of the cerebellum	cerebellar hypoplasia, a thin corpus callosum, and simplified gyral pattern in the temporal regions	ND		broadening of bilateral temporal extracranial space , left frontal subdural effusion, and cyst in the right choroid plexus
Hypotonia	no	yes	yes	yes	yes	yes	no	yes	ND	no	no	no?	yes	no	ND	no	yes	yes	yes	yes	yes	yes	yes	ND	no	no	yes	16/27	no
Hypertonia	ND	ND	ND	ND	ND	ND	ND	ND	ND	ND	ND	ND	ND	ND	ND	ND	ND	ND	ND	ND	ND	ND	ND	ND	yes	yes	no	2/27	no
Feeding difficulties	ND	ND	ND	ND	ND	ND	ND	ND	ND	ND	ND	ND	ND	ND	ND	no	yes	yes	ND	ND	ND	ND	yes	yes	ND	ND	yes	5/27	yes
Respiratory insufficiency	yes	yes	yes	yes	yes	apneic episodes in newborn period	no	ND	ND	ND	yes	ND	no	yes	ND	no	no	ND	ND	ND	ND	ND	ND	ND	yes	yes	ND	10/27	no
Abnormal respiratory pattern in newborn period	yes	yes	yes	yes	yes	yes	no	ND	ND	ND	yes	yes	no	yes	ND	ND	ND	ND	ND	ND	ND	ND	ND	ND	yes	yes	ND	11/27	no
Excessive drooling	ND	ND	ND	ND	ND	yes	ND	ND	ND	yes	yes	yes	ND	ND	ND	ND	ND	ND	ND	ND	ND	ND	ND	ND	ND	ND	ND	4/27	yes
Gastroesophageal reflux disease	ND	yes	ND	yes	yes	yes	ND	no	yes	yes	yes	yes	in infancy	no	ND	ND	ND	ND	no	yes	yes	yes	ND	ND	ND	ND	ND	12/27	ND
Constipation	ND	occasional	ND	no	ND	yes	ND	ND	ND	yes	yes	yes	ND	ND	ND	ND	ND	ND	yes	yes	no	no	ND	ND	ND	ND	ND	7/27	ND
Hernia	no	inguinal	inguinal	inguinal / peri umbilical	inguinal	no	inguinal	no	inguinal	inguinal	inguinal	ND	umbilical	no	ND	ND	ND	ND	ND	ND	ND	ND	ND	ND	ND	ND	ND	9/27	no
Polyhydramnios	ND	ND	ND	ND	ND	ND	ND	ND	ND	ND	ND	ND	ND	ND	ND	ND	ND	ND	yes	yes	yes	no	ND	ND	yes	yes	ND	5/27	no
Ataxia	ND	ND	ND	ND	ND	ND	ND	ND	ND	ND	ND	ND	ND	ND	yes	yes	no	ND	ND	ND	ND	ND	ND	ND	ND	ND	ND	2/27	no
Behavioral anomalies	ND	ND	ND	ND	ND	ND	ND	ND	ND	ND	ND	ND	ND	ND	yes	Involuntary movement	ND	Stereotypic movements	ND	ND	ND	ND	ND	ND	ND	ND	ND	4/27	ND
Other	ND	central apnea, uric acid renal stones	11 pairs of ribs, abnormal pelvis and scapulae	renal calcifications	ND	suspected fatty acid oxidation defect	ND	ND	cleft palate	ND	mitral valve prolapse	ND	small VSD	ND	small atrial and ventricular septal defects	Small hands with distal digital hypoplasia	ND	Plagiocephaly, small femor and humerus	ND	ND	ND	ND	ND	episodes of hypercontraction of arms and legs		bell-shaped thorax,hip dislocation bilaterally		hyporeflexia	patent foramen ovale
ND, no data were available; NA, not applicable
